# Supplementary material for: The Impact of Traditional Chinese Medicine QingreHuoxue Treatment and the Combination of Methotrexate and Hydroxychloroquine on the Radiological Progression of Active Rheumatoid Arthritis: A 52-Week Follow-Up of a Randomized Controlled Clinical Study
Source: Hindawi journal article supplement (doi:10.1155/2022/5808400), 2022-04-12
Supplement: f1 [file 5808400.f1.zip]

| Group | name    | original source data(baseline) |               |                 |                  |                 |                 |                 |                 |                 |                  |                 |                |                |                |               |
|-------|---------|--------------------------------|---------------|-----------------|------------------|-----------------|-----------------|-----------------|-----------------|-----------------|------------------|-----------------|----------------|----------------|----------------|---------------|
|       |         | gender                         | year of birth | Course (month ) | DAS28(baseline ) | CRP (baseline ) | ESR (baseline ) | TJC (baseline ) | SJC (baseline ) | VAS (baseline ) | PhGA (baseline ) | PGA (baseline ) | HAQ(baseline ) | TSS(baseline ) | JSN(baseline ) | JE(baseline ) |
|       |         | (1=male, 2=female )            |               |                 |                  |                 |                 |                 |                 |                 |                  |                 |                |                |                |               |
|       | 2 Hyi C | 2                              | 1955          | 13              | 5.21             | 19.1            | 36              | 6               | 5               | 50              | 60               | 50              | 21             | 21             | 13             | 8             |
|       | 2 Yru C | 2                              | 1959          | 6               | 5.44             | 35.2            | 43              | 4               | 12              | 50              | 60               | 85              | 9              | 18             | 16             | 2             |
|       | 1 Fxi C | 2                              | 1969          | 30              | 8.39             | 13.81           | 65              | 28              | 24              | 80              | 80               | 80              | 40             | 3              | 2              | 1             |
|       | 1 Hgu C | 1                              | 1968          | 12              | 6.84             | 82.6            | 24              | 25              | 12              | 60              | 70               | 80              | 15             | 0              | 0              | 0             |
|       | 2 Sh Ch | 2                              | 1988          | 9               | 6.45             | 0               | 36              | 14              | 11              | 65              | 65               | 65              | 16             | 0              | 0              | 0             |
|       | 3 Sho C | 1                              | 1964          | 12              | 7.35             | 82.2            | 86              | 25              | 7               | 50              | 50               | 60              | 15             | 0              | 0              | 0             |
|       | 1 Zli C | 2                              | 1981          | 24              | 5.17             | 11.3            | 21              | 11              | 3               | 50              | 50               | 60              | 29             | 14             | 11             | 3             |
|       | 1 Gxi D | 2                              | 1964          | 24              | 6                | 12              | 83              | 7               | 8               | 45              | 45               | 35              | 18             | 2              | 0              | 2             |
|       | 1 Yli D | 2                              | 1973          | 12              | 5.12             | 3.85            | 25              | 10              | 2               | 50              | 40               | 40              | 8              | 6              | 6              | 0             |
|       | 1 Lxi D | 2                              | 1952          | 30              | 6.14             | 15.7            | 65              | 12              | 8               | 35              | 30               | 40              | 16             | 20             | 14             | 6             |
|       | 3 We Fa | 1                              | 1967          | 60              | 5.39             | 13.65           | 16              | 11              | 10              | 50              | 90               | 80              | 11             | 71             | 48             | 23            |
|       | 2 Eyu F | 1                              | 1951          | 0.5             | 4.2              | 0.4             | 14              | 11              | 2               | 8               | 6                | 8               | 14             | 13             | 13             | 0             |
|       | 3 Pi Fe | 2                              | 1950          | 10              | 5                | 9.28            | 65              | 4               | 2               | 40              | 50               | 50              | 13             | 3              | 3              | 0             |
|       | 1 Lli G | 2                              | 1970          | 240             | 6.53             | 5               | 92              | 9               | 9               | 60              | 60               | 60              | 13             | 7              | 5              | 2             |
|       | 3 Xyu G | 2                              | 1955          | 36              | 5.81             | 18.96           | 46              | 9               | 7               | 50              | 60               | 80              | 25             | 19             | 16             | 3             |
|       | 1 Mxi G | 2                              | 1955          | 30              | 4.61             | 6.41            | 22              | 5               | 3               | 50              | 50               | 35              | 4              | 14             | 13             | 1             |
|       | 3 Jxi G | 2                              | 1960          | 5               | 4.26             | 3.42            | 9               | 9               | 3               | 40              | 30               | 40              | 0              | 0              | 0              | 0             |
|       | 2 Rfe G | 2                              | 1957          | 24              | 7.71             | 10.94           | 28              | 28              | 26              | 70              | 70               | 80              | 15             | 65             | 50             | 15            |
|       | 2 Wqi G | 2                              | 1968          | 16              | 5.19             | 1.52            | 33              | 4               | 3               | 80              | 45               | 40              | 13             | 0              | 0              | 0             |
|       | 3 Jyi H | 2                              | 1977          | 10              | 3.1              | 1               | 14              | 4               | 0               | 10              | 10               | 20              | 2              | 17             | 16             | 1             |
|       | 3 Qru H | 2                              | 1956          | 34              | 5.62             | 12              | 113             | 3               | 5               | 50              | 50               | 75              | 16             | 96             | 54             | 42            |
|       | 3 We Ha | 2                              | 1965          | 4               | 4.5              | 32.3            | 83              | 1               | 1               | 40              | 40               | 50              | 6              | 14             | 13             | 1             |
|       | 2 Jbo H | 2                              | 1982          | 36              | 3.37             | 1.49            | 5               | 4               | 4               | 40              | 51               | 51              | 3              | 33             | 23             | 10            |
|       | 3 Jxi J | 2                              | 1964          | 19              | 3.48             | 2.17            | 12              | 3               | 3               | 20              | 20               | 20              | 0              | 0              | 0              | 0             |
|       | 1 Lli J | 2                              | 1980          | 19              | 4.43             | 14.92           | 23              | 5               | 4               | 30              | 30               | 40              | 3              | 8              | 8              | 0             |
|       | 1 Lu Ji | 2                              | 1979          | 3               | 6.28             | 2.7             | 31              | 16              | 11              | 50              | 50               | 50              | 26             | 41             | 14             | 27            |
|       | 1 Xqi K | 2                              | 1954          | 24              | 5.48             | 8.839           | 68              | 4               | 3               | 65              | 60               | 60              | 14             | 0              | 0              | 0             |
|       | 2 Xqi K | 2                              | 1971          | 16              | 5.92             | 8.21            | 28              | 11              | 10              | 60              | 72               | 75              | 6              | 36             | 27             | 9             |
|       | 1 Csh L | 2                              | 1962          | 24              | 5.87             | 17.956          | 96              | 4               | 4               | 70              | 50               | 60              | 19             | 0              | 0              | 0             |

| Group | name  | gender              | year of birth | Course (month ) | DAS28(baseline ) | CRP (baseline ) | ESR (baseline ) | TJC (baseline ) | SJC (baseline ) | VAS (baseline ) | PhGA (baseline ) | PGA (baseline ) | HAQ(baseline ) | TSS(baseline ) | JSN(baseline ) | JE(baseline ) |
|-------|-------|---------------------|---------------|-----------------|------------------|-----------------|-----------------|-----------------|-----------------|-----------------|------------------|-----------------|----------------|----------------|----------------|---------------|
|       |       | (1=male, 2=female ) |               |                 |                  |                 |                 |                 |                 |                 |                  |                 |                |                |                |               |
| 1     | Jho L | 2                   | 1959          | 36              | 4.54             | 1.12            | 33              | 5               | 1               | 40              | 30               | 30              | 4              | 9              | 7              | 2             |
| 3     | Jyu L | 2                   | 1996          | 24              | 4.77             | 48.25           | 26              | 3               | 15              | 30              | 30               | 50              | 1              | 135            | 70             | 65            |
| 1     | Jpi L | 2                   | 1951          | 1               | 6.08             | 14.017          | 77              | 11              | 5               | 40              | 45               | 50              | 11             | 1              | 1              | 0             |
| 1     | Sju L | 2                   | 1981          | 7               | 5.47             | 6.88            | 71              | 3               | 13              | 35              | 50               | 80              | 12             | 5              | 5              | 0             |
| 3     | Xbo L | 1                   | 1979          | 24              | 6.6              | 18.6            | 23              | 25              | 5               | 70              | 70               | 70              | 0              | 3              | 2              | 1             |
| 2     | Xhu L | 2                   | 1972          | 24              | 4.15             | 3               | 4               | 10              | 4               | 60              | 60               | 50              | 13             | 12             | 12             | 0             |
| 3     | Fya L | 2                   | 1959          | 7               | 6.8              | 45.73           | 55              | 14              | 14              | 60              | 60               | 60              | 25             | 1              | 1              | 0             |
| 3     | Ghu L | 2                   | 1955          | 12              | 6.92             | 17.2            | 73              | 13              | 13              | 63              | 65               | 63              | 6              | 9              | 8              | 1             |
| 3     | Hti L | 2                   | 1953          | 16              | 4.75             | 0.03            | 21              | 6               | 6               | 40              | 40               | 55              | 3              | 0              | 0              | 0             |
| 2     | Jla L | 2                   | 1969          | 48              | 5.41             | 18.5            | 42              | 5               | 3               | 75              | 60               | 50              | 11             | 4              | 4              | 0             |
| 1     | Jhu L | 2                   | 1977          | 12              | 6.5              | 1.44            | 22              | 21              | 11              | 60              | 60               | 60              | 40             | 0              | 0              | 0             |
| 3     | Li Li | 2                   | 1969          | 12              | 5.52             | 10.1            | 43              | 7               | 4               | 60              | 40               | 70              | 7              | 5              | 4              | 1             |
| 3     | Mi Li | 2                   | 1955          | 30              | 7.13             | 12.6            | 80              | 18              | 16              | 40              | 40               | 50              | 15             | 40             | 24             | 16            |
| 2     | Syi L | 2                   | 1958          | 8               | 4.33             | 8.44            | 22              | 4               | 3               | 40              | 50               | 40              | 18             | 1              | 1              | 0             |
| 2     | Xme L | 2                   | 1964          | 24              | 6.36             | 19.9            | 45              | 10              | 11              | 70              | 70               | 70              | 33             | 68             | 48             | 20            |
| 2     | Wji L | 2                   | 1983          | 36              | 4.48             | 2.18            | 6               | 8               | 8               | 60              | 60               | 60              | 8              | 74             | 62             | 12            |
| 2     | Bju M | 2                   | 1977          | 12              | 5.26             | 3.88            | 19              | 12              | 4               | 50              | 50               | 40              | 10             | 10             | 9              | 1             |
| 1     | Gpi M | 2                   | 1965          | 24              | 6.85             | 3.32            | 34              | 16              | 13              | 80              | 80               | 85              | 7              | 8              | 8              | 0             |
| 2     | Wyi M | 2                   | 1988          | 22              | 5.74             | 131.45          | 80              | 4               | 4               | 70              | 70               | 80              | 17             | 63             | 45             | 18            |
| 2     | Ji Me | 2                   | 1964          | 48              | 5.02             | 36              | 44              | 5               | 3               | 45              | 40               | 30              | 1              | 15             | 14             | 1             |
| 1     | Yhu M | 2                   | 1974          | 6               | 5.25             | 37.74           | 63              | 6               | 4               | 30              | 60               | 55              | 10             | 5              | 5              | 0             |
| 1     | Xro N | 2                   | 1978          | 72              | 7.35             | 2.87            | 40              | 26              | 11              | 70              | 70               | 80              | 20             | 4              | 2              | 2             |
| 3     | Yli P | 2                   | 1962          | 30              | 6.19             | 11.2            | 71              | 10              | 6               | 53              | 47               | 50              | 5              | 2              | 1              | 1             |
| 3     | Jju R | 2                   | 1972          | 24              | 4.17             | 3.28            | 10              | 6               | 3               | 50              | 40               | 60              | 2              | 50             | 33             | 17            |
| 3     | Yli S | 1                   | 1954          | 12              | 5.89             | 27.3            | 52              | 7               | 8               | 60              | 70               | 70              | 32             | 7              | 7              | 0             |
| 3     | Cxi S | 2                   | 1972          | 1               | 6.8              | 4.9             | 41              | 21              | 8               | 60              | 60               | 80              | 13             | 0              | 0              | 0             |
| 1     | Syu S | 2                   | 1953          | 20              | 5.66             | 15.6            | 113             | 6               | 3               | 35              | 50               | 100             | 14             | 3              | 3              | 0             |
| 2     | Xla S | 2                   | 1955          | 34              | 7.53             |                 | 48              | 26              | 16              | 60              | 60               | 50              | 21             | 3              | 1              | 2             |
| 3     | Mpi T | 2                   | 1956          | 34              | 6.83             | 1.05            | 25              | 23              | 14              | 60              | 60               | 60              | 27             | 54             | 18             | 36            |
| 3     | Ji Ti | 2                   | 1958          | 20              | 6.24             | 8.93            | 32              | 14              | 13              | 50              | 40               | 40              | 27             | 12             | 6              | 6             |

| Group | name    | gender              | year of birth | Course (month ) | DAS28(baseline ) | CRP (baseline ) | ESR (baseline ) | TJC (baseline ) | SJC (baseline ) | VAS (baseline ) | PhGA (baseline ) | PGA (baseline ) | HAQ(baseline ) | TSS(baseline ) | JSN(baseline ) | JE(baseline ) |
|-------|---------|---------------------|---------------|-----------------|------------------|-----------------|-----------------|-----------------|-----------------|-----------------|------------------|-----------------|----------------|----------------|----------------|---------------|
|       |         | (1=male, 2=female ) |               |                 |                  |                 |                 |                 |                 |                 |                  |                 |                |                |                |               |
|       | 2 Xya T | 2                   | 1976          | 36              | 4.8              | 7.5             | 28              | 6               | 2               | 50              | 40               | 60              | 13             | 73             | 54             | 19            |
|       | 2 Sde W | 1                   | 1968          | 32              | 6.4              | 112             | 113             | 4               | 20              | 50              | 80               | 50              | 10             | 35             | 21             | 14            |
|       | 2 Hqi W | 2                   | 1963          | 36              | 6.96             | 27.7            | 87              | 17              | 6               | 60              | 70               | 70              | 9              | 0              | 0              | 0             |
|       | 2 Jyu W | 1                   | 1953          | 36              | 6.17             | 52.1            | 50              | 12              | 8               | 50              | 70               | 80              | 10             | 22             | 13             | 9             |
|       | 2 Li Wa | 2                   | 1982          | 15              | 4.68             | 3.45            | 10              | 9               | 6               | 50              | 50               | 60              | 22             | 5              | 5              | 0             |
|       | 1 Lju W | 2                   | 1975          | 15              | 5.37             | 7.79            | 55              | 6               | 6               | 36              | 47               | 53              | 3              | 12             | 12             | 0             |
|       | 1 Mi Wa | 2                   | 1982          | 7               | 5.19             | 9.25            | 20              | 7               | 3               | 80              | 70               | 30              | 13             | 6              | 6              | 0             |
|       | 3 Pi Wa | 1                   | 1959          | 12              | 4.46             | 3.55            | 30              | 4               | 2               | 40              | 40               | 40              | 18             | 0              | 0              | 0             |
|       | 3 Rha W | 1                   | 1963          | 72              | 6.01             | 0.68            | 30              | 12              | 9               | 60              | 60               | 60              | 7              | 0              | 0              | 0             |
|       | 2 Sli W | 2                   | 1957          | 36              | 6.31             | 17.4            | 31              | 16              | 6               | 70              | 70               | 70              | 0              | 2              | 2              | 0             |
|       | 2 Sfe W | 2                   | 1954          | 24              | 5.98             | 35              | 21              | 14              | 14              | 50              | 50               | 50              | 27             | 5              | 2              | 3             |
|       | 1 Szh W | 2                   | 1962          | 72              | 4.81             | 9.86            | 35              | 4               | 4               | 45              | 60               | 60              | 3              | 13             | 9              | 4             |
|       | 3 Xxi W | 2                   | 1958          | 24              | 4.71             | 3.45            | 16              | 8               | 5               | 40              | 50               | 50              | 19             | 1              | 0              | 1             |
|       | 1 Xho W | 2                   | 1970          | 12              | 4.17             | 20.1            | 17              | 3               | 3               | 52              | 51               | 51              | 5              | 0              | 0              | 0             |
|       | 1 Xyi W | 2                   | 1955          | 6               | 6.35             | 82.06           | 82              | 10              | 10              | 43              | 45               | 54              | 17             | 5              | 4              | 1             |
|       | 2 Yju W | 1                   | 1973          | 6               | 6.2              | 21.6            | 40              | 15              | 10              | 40              | 50               | 50              | 4              | 0              | 0              | 0             |
|       | 2 Cli W | 1                   | 1981          | 24              | 6.47             | 22.3            | 64              | 11              | 11              | 55              | 80               | 100             | 20             | 2              | 2              | 0             |
|       | 3 Sju W | 2                   | 1959          | 12              | 4.59             | 15.8            | 33              | 1               | 21              | 20              | 30               | 20              | 2              | 10             | 8              | 2             |
|       | 2 We We | 2                   | 1953          | 240             | 6.47             | 6               | 51              | 12              | 11              | 60              | 60               | 60              | 9              | 8              | 7              | 1             |
|       | 3 Gue W | 2                   | 1959          | 13              | 4.93             | 7.9             | 44              | 8               | 0               | 50              | 50               | 50              | 8              | 6              | 6              | 0             |
|       | 2 Yme W | 2                   | 1982          | 18              | 5.22             | 1.1             | 26              | 9               | 5               | 45              | 45               | 45              | 9              | 0              | 0              | 0             |
|       | 2 Xme W | 2                   | 1965          | 26              | 5.18             | 3.08            | 25              | 7               | 7               | 50              | 50               | 60              | 7              | 3              | 0              | 3             |
|       | 1 Ypi X | 2                   | 1969          | 1               | 4.31             | 1.01            | 11              | 8               | 3               | 40              | 30               | 40              | 0              | 0              | 0              | 0             |
|       | 1 Hya X | 2                   | 1977          | 19              | 6.36             | 29.4            | 28              | 15              | 13              | 60              | 60               | 50              | 14             | 7              | 7              | 0             |
|       | 3 Swe X | 2                   | 1983          | 3               | 4.51             | 2.03            | 21              | 9               | 1               | 30              | 30               | 30              | 1              | 2              | 2              | 0             |
|       | 2 Hni Y | 1                   | 1972          | 6               | 5.71             | 16.83           | 20              | 12              | 12              | 50              | 45               | 45              | 6              | 10             | 8              | 2             |
|       | 1 Ju Ya | 2                   | 1949          | 5               | 4.7              | 20.3            | 29              | 4               | 8               | 30              | 60               | 60              | 9              | 8              | 8              | 0             |
|       | 2 Li Ya | 2                   | 1985          | 9               | 5.32             | 4.67            | 39              | 11              | 3               | 30              | 30               | 30              | 1              | 1              | 1              | 0             |
|       | 3 Lxi Y | 2                   | 1970          | 24              | 5.08             | 25.02           | 26              | 5               | 5               | 65              | 80               | 80              | 9              | 10             | 9              | 1             |
|       | 3 Xyu Y | 2                   | 1973          | 6               | 3.91             | 1.37            | 6               | 6               | 6               | 42              | 39               | 38              | 4              | 0              | 0              | 0             |

| Group | name    | gender              | year of birth | Course (month ) | DAS28(baseline ) | CRP (baseline ) | ESR (baseline ) | TJC (baseline ) | SJC (baseline ) | VAS (baseline ) | PhGA (baseline ) | PGA (baseline ) | HAQ(baseline ) | TSS(baseline ) | JSN(baseline ) | JE(baseline ) |    |
|-------|---------|---------------------|---------------|-----------------|------------------|-----------------|-----------------|-----------------|-----------------|-----------------|------------------|-----------------|----------------|----------------|----------------|---------------|----|
|       |         | (1=male, 2=female ) |               |                 |                  |                 |                 |                 |                 |                 |                  |                 |                |                |                |               |    |
|       | 2 Xne Y |                     | 2             | 1966            | 6                | 3.94            | 3.28            | 8               | 8               | 3               | 30               | 40              | 40             | 3              | 6              | 5             | 1  |
|       | 3 Hxi Z |                     | 2             | 1956            | 24               | 3.51            | 11.6            | 6.1             | 3               | 4               | 50               | 60              | 90             | 14             | 12             | 9             | 3  |
|       | 3 Chu Z |                     | 2             | 1968            | 12               | 5.56            | 4.11            | 16              | 13              | 4               | 74               | 80              | 50             | 33             | 5              | 5             | 0  |
|       | 1 Fyi Z |                     | 2             | 1966            | 36               | 6.1             | 6.71            | 41              | 10              | 10              | 60               | 70              | 60             | 16             | 7              | 7             | 0  |
|       | 3 Jhu Z |                     | 2             | 1970            | 24               | 4.38            | 9.98            | 11              | 6               | 5               | 50               | 40              | 50             | 7              | 12             | 8             | 4  |
|       | 3 Jqi Z |                     | 2             | 1960            | 4                | 6.36            | 30              | 92              | 6               | 6               | 80               | 80              | 80             | 9              | 1              | 0             | 1  |
|       | 1 Qni Z |                     | 2             | 1979            | 9                | 5.93            | 2.08            | 22              | 16              | 6               | 60               | 60              | 60             | 4              | 0              | 0             | 0  |
|       | 1 Xya Z |                     | 2             | 1982            | 26               | 5.07            | 5.29            | 18              | 11              | 5               | 40               | 40              | 40             | 3              | 26             | 12            | 14 |
|       | 2 Xzh Z |                     | 2             | 1958            | 28               | 6.32            | 3.28            | 23              | 13              | 12              | 80               | 70              | 90             | 18             | 56             | 40            | 16 |
|       | 2 Zch Z |                     | 1             | 1963            | 8                | 5.37            | 55.7            | 33              | 13              | 3               | 30               | 40              | 30             | 1              | 10             | 7             | 3  |
|       | 2 Mju Z |                     | 2             | 1984            | 9                | 5.64            | 12.2            | 46              | 10              | 3               | 50               | 40              | 50             | 9              | 0              | 0             | 0  |
|       | 3 Zyi Z |                     | 2             | 1987            | 18               | 5.12            | 11.5            | 25              | 5               | 5               | 70               | 70              | 70             | 22             | 23             | 20            | 3  |
|       | 3 Cne Z |                     | 2             | 1960            | 3                | 7.56            | 3.69            | 50              | 28              | 7               | 80               | 90              | 100            | 33             | 0              | 0             | 0  |
|       | 1 Mfa Z |                     | 2             | 1952            | 12               | 7.08            | 8.11            | 18              | 28              | 12              | 80               | 80              | 80             | 25             | 0              | 0             | 0  |
|       | 3 Mi Zh |                     | 2             | 1969            | 36               | 5.38            | 1.88            | 16              | 8               | 8               | 75               | 84              | 77             | 8              | 39             | 27            | 12 |
|       | 1 Jme Z |                     | 2             | 1965            | 13               | 4.49            | 12.37           | 13              | 6               | 4               | 54               | 60              | 50             | 4              | 14             | 11            | 3  |
|       | 2 Rqi H |                     | 2             | 1971            | 56               | 5.39            | 1               | 23              | 10              | 8               | 45               | 50              | 35             | 6              |                |               |    |
|       | 3 Xyu W |                     | 2             | 1967            | 60               | 5.47            | 26.77           | 75              | 3               | 3               | 70               | 70              | 70             | 8              |                |               |    |
|       | 3 Ju Wa |                     | 2             | 1978            | 16               | 5.59            | 1               | 26              | 10              | 5               | 65               | 60              | 45             | 9              |                |               |    |
|       | 1 Sju Z |                     | 2             | 1957            | 36               | 5.45            | 32              | 88              | 4               | 3               | 50               | 50              | 70             | 11             |                |               |    |
|       | 2 Lli H |                     | 2             | 1981            | 68               | 7.16            | 15              | 50              | 15              | 16              | 80               | 70              | 60             | 7              |                |               |    |
|       | 1 Yi Wa |                     | 2             | 1967            | 4                | 5.91            | 4               | 19              | 17              | 9               | 50               | 55              | 45             | 19             |                |               |    |
|       | 3 Ypi M |                     | 2             | 1963            | 29               | 4.94            | 5               | 34              | 3               | 8               | 50               | 40              | 50             | 4              |                |               |    |
|       | 3 Hyu X |                     | 2             | 1957            | 1                | 6.69            | 1.36            | 54              | 14              | 7               | 75               | 60              | 80             | 19             |                |               |    |
|       | 3 Yme Z |                     | 2             | 1979            | 41               | 5.98            | 5.15            | 26              | 15              | 6               | 60               | 60              | 80             | 6              |                |               |    |
|       | 2 Fro G |                     | 2             | 1952            | 14               | 7.02            | 8               | 22              | 20              | 15              | 90               | 80              | 80             | 18             |                |               |    |
|       | 1 Sxi R |                     | 2             | 1966            | 48               | 7.59            | 72.34           | 91              | 17              | 11              | 85               | 85              | 85             | 34             |                |               |    |
|       | 3 Xi Ya |                     | 2             | 1968            | 12               | 5.38            | 26.05           | 77              | 2               | 5               | 65               | 60              | 70             | 6              |                |               |    |
|       | 2 Xla Q |                     | 2             | 1963            | 49               | 4.27            | 1.93            | 23              | 4               | 2               | 40               | 30              | 30             | 5              |                |               |    |
|       | 1 Jli C |                     | 2             | 1964            | 34               | 6.65            | 59.89           | 96              | 8               | 7               | 80               | 70              | 70             | 30             |                |               |    |

| Group | name  | gender              | year of birth | Course (month ) | DAS28(baseline ) | CRP (baseline ) | ESR (baseline ) | TJC (baseline ) | SJC (baseline ) | VAS (baseline ) | PhGA (baseline ) | PGA (baseline ) | HAQ (baseline ) | TSS (baseline ) | JSN (baseline ) | JE (baseline ) |
|-------|-------|---------------------|---------------|-----------------|------------------|-----------------|-----------------|-----------------|-----------------|-----------------|------------------|-----------------|-----------------|-----------------|-----------------|----------------|
|       |       | (1=male, 2=female ) |               |                 |                  |                 |                 |                 |                 |                 |                  |                 |                 |                 |                 |                |
| 2     | Jji Z | 2                   | 1971          | 4               | 5.5              | 1               | 23              | 11              | 7               | 50              | 40               | 70              | 15              |                 |                 |                |
| 2     | Xwa L | 2                   | 1974          | 36              | 3.9              | 8.1             | 18              | 3               | 3               | 30              | 30               | 40              | 1               |                 |                 |                |
| 3     | Lju M | 2                   | 1954          | 28              | 7.16             | 9.09            | 45              | 16              | 16              | 80              | 80               | 50              | 10              |                 |                 |                |
| 2     | Zyu L | 1                   | 1973          | 60              | 4.83             | 53              | 30              | 4               | 3               | 60              | 50               | 80              | 13              |                 |                 |                |
| 1     | Ju Wa | 2                   | 1967          | 6               | 5.89             | 9.4             | 23              | 15              | 6               | 60              | 60               | 60              | 4               |                 |                 |                |
| 1     | Cfa Z | 1                   | 1949          | 5               | 7.68             | 14              | 86              | 15              | 16              | 90              | 80               | 90              | 43              |                 |                 |                |
| 3     | Wxi Y | 1                   | 1964          | 5               | 5.32             | 3.56            | 38              | 5               | 7               | 55              | 50               | 80              | 7               |                 |                 |                |
| 1     | Ywe L | 2                   | 1983          | 24              | 6.14             | 160             | 104             | 7               | 4               | 60              | 70               | 80              | 15              |                 |                 |                |
| 3     | Szh Y | 2                   | 1951          | 4               | 8.38             | 46              | 96              | 25              | 20              | 80              | 70               | 80              | 40              |                 |                 |                |
| 1     | Lpi L | 1                   | 1953          | 14              | 4.57             | 10.22           | 68              | 2               | 2               | 30              | 40               | 30              | 0               |                 |                 |                |
| 2     | Zlo Y | 1                   | 1964          | 36              | 5.66             | 53.24           | 66              | 3               | 3               | 90              | 60               | 50              | 5               |                 |                 |                |
| 2     | Xta P | 2                   | 1985          | 8               | 5.73             | 1               | 36              | 10              | 10              | 40              | 40               | 20              | 0               |                 |                 |                |
| 1     | Dzh Y | 2                   | 1975          | 18              | 5.9              | 14.42           | 49              | 7               | 9               | 60              | 60               | 50              | 15              |                 |                 |                |
| 1     | Lru Z | 2                   | 1962          | 15              | 4.06             | 7               | 23              | 4               | 2               | 25              | 30               | 30              | 1               |                 |                 |                |
| 3     | Wdo L | 1                   | 1971          | 30              | 3.95             | 12.27           | 6               | 7               | 8               | 30              | 40               | 60              | 0               |                 |                 |                |
| 2     | Li Ma | 2                   | 1964          | 60              | 4.93             | 20              | 23              | 5               | 4               | 65              | 50               | 50              | 11              |                 |                 |                |
| 1     | Gya L | 1                   | 1990          | 120             | 7.18             | 100.88          | 65              | 16              | 10              | 80              | 80               | 80              | 23              |                 |                 |                |
| 3     | Hzh Z | 1                   | 1983          | 24              | 4.61             | 17              | 13              | 7               | 5               | 50              | 30               | 20              | 0               |                 |                 |                |
| 1     | Dfa Y | 2                   | 1950          | 12              | 6.23             | 4.51            | 64              | 8               | 7               | 70              | 60               | 70              | 15              |                 |                 |                |
| 1     | Yzh B | 2                   | 1962          | 36              | 5.62             | 12.21           | 25              | 10              | 10              | 50              | 60               | 50              | 13              |                 |                 |                |
| 3     | Zpi S | 2                   | 1963          | 4               | 4.68             | 1.15            | 44              | 4               | 3               | 30              | 30               | 35              | 2               |                 |                 |                |
| 1     | Cta D | 2                   | 1986          | 48              | 6.47             | 8.13            | 33              | 15              | 13              | 60              | 70               | 60              | 9               |                 |                 |                |
| 2     | Yqi Z | 2                   | 1956          | 30              | 4.67             | 20.43           | 46              | 2               | 3               | 50              | 40               | 50              | 11              |                 |                 |                |
| 1     | Mxi X | 2                   | 1979          | 36              | 5.89             | 7.77            | 27              | 9               | 16              | 55              | 60               | 50              | 17              |                 |                 |                |
| 3     | Cla A | 2                   | 1961          | 28              | 7.54             | 7.71            | 69              | 19              | 13              | 80              | 75               | 80              | 31              |                 |                 |                |
| 2     | Ju Wa | 2                   | 1966          | 120             | 6.65             | 16.74           | 52              | 14              | 13              | 55              | 60               | 65              | 14              |                 |                 |                |
| 3     | Dda D | 2                   | 1984          | 9               | 7.87             | 20.85           | 49              | 27              | 20              | 70              | 79               | 70              | 23              |                 |                 |                |
| 3     | Fme L | 2                   | 1971          | 36              | 4.77             | 6.64            | 25              | 5               | 4               | 50              | 40               | 50              | 9               |                 |                 |                |
| 1     | Jhu C | 2                   | 1965          | 46              | 6.3              | 26              | 17              | 16              | 24              | 50              | 70               | 70              | 29              |                 |                 |                |
| 3     | Ji Zh | 2                   | 1970          | 24              | 8.3              | 83.8            | 86              | 23              | 17              | 95              | 80               | 85              | 30              |                 |                 |                |

| Group | name  | gender<br>(1=male,<br>2=female) | year of<br>birth | Course<br>(month) | DAS28(b<br>aseline) | CRP<br>(baseline) | ESR<br>(baseline) | TJC<br>(baseline) | SJC<br>(baseline) | VAS<br>(baseline) | PhGA<br>(baseline) | PGA<br>(baseline) | HAQ(bas<br>eline) | TSS(bas<br>eline) | JSN(bas<br>eline) | JE(base<br>line) |
|-------|-------|---------------------------------|------------------|-------------------|---------------------|-------------------|-------------------|-------------------|-------------------|-------------------|--------------------|-------------------|-------------------|-------------------|-------------------|------------------|
| 2     | Qso L | 1                               | 1975             | 28                | 6.91                | 80.94             | 72                | 13                | 14                | 60                | 60                 | 80                | 19                |                   |                   |                  |
| 3     | Fqi W | 2                               | 1976             | 72                | 7.03                | 1                 | 31                | 18                | 16                | 80                | 75                 | 85                | 23                |                   |                   |                  |
| 3     | Lfe W | 2                               | 1956             | 12                | 6.19                | 18.94             | 77                | 9                 | 5                 | 60                | 60                 | 80                | 20                |                   |                   |                  |
| 2     | Xme L | 2                               | 1975             | 48                | 5.38                | 11.76             | 27                | 9                 | 6                 | 50                | 50                 | 45                | 6                 |                   |                   |                  |

Note: DAS28 28-joint count Disease Activity Score, CRP C-reactive protein, ESR erythrocyte sedimentation rate, TJC tender joint count, SJC swollen joint count, VAS visual analogue scale, PhGA Physician' s global assessment of disease activity, PGA Patient' s global assessment of disease activity, HAQ Health Assessment Questionnaire, TSS total Sharp score, JSN joint gap narrow score, JE joint erosion score.
