# Supplementary material for: The Impact of Traditional Chinese Medicine QingreHuoxue Treatment and the Combination of Methotrexate and Hydroxychloroquine on the Radiological Progression of Active Rheumatoid Arthritis: A 52-Week Follow-Up of a Randomized Controlled Clinical Study
Source: Hindawi journal article supplement (doi:10.1155/2022/5808400), 2022-04-12
Supplement: f1 [file 5808400.f1.zip]

| Group | name    | gender<br>(1=male,<br>2=female ) | year of<br>birth | original source data(52w)                        |                                                                                                   |              |               |              |              |              |                |              |              |             |    |    |
|-------|---------|----------------------------------|------------------|--------------------------------------------------|---------------------------------------------------------------------------------------------------|--------------|---------------|--------------|--------------|--------------|----------------|--------------|--------------|-------------|----|----|
|       |         |                                  |                  | 24w-<br>52w_treat<br>(non=0,<br>treatment=1<br>) | 24w-<br>52w_me<br>d<br>(TCM= TJC<br>(52w<br>)<br>SJC<br>(52w<br>)<br>WM=1,<br>IM=2,<br>non=3<br>) | VAS<br>(52w) | PhGA(5<br>2w) | PGA(52<br>w) | HAQ(52<br>w) | ESR<br>(52w) | DAS28(<br>52w) | TSS(52<br>w) | JSN(52<br>w) | JE(52w<br>) |    |    |
|       | 2 Hyi C | 2                                | 1955             | 1                                                | 2                                                                                                 | 3            | 0             | 10           | 10           | 10           | 2              | 17           | 3.09         | 25          | 16 | 9  |
|       | 2 Yru C | 2                                | 1959             | 0                                                |                                                                                                   | 3            | 2             | 0            | 50           | 40           | 5              | 30           | 3.74         | 18          | 16 | 2  |
|       | 1 Fxi C | 2                                | 1969             | 0                                                |                                                                                                   | 14           | 4             | 30           | 30           | 30           | 20             | 70           | 6.04         | 3           | 2  | 1  |
|       | 1 Hgu C | 1                                | 1968             | 0                                                |                                                                                                   | 11           | 1             | 40           | 30           | 40           | 8              | 25           | 4.95         | 2           | 2  | 0  |
|       | 2 Sh Ch | 2                                | 1988             | 0                                                |                                                                                                   | 11           | 1             | 0            | 10           | 5            | 0              | 3            | 2.89         | 0           | 0  | 0  |
|       | 3 Sho C | 1                                | 1964             | 0                                                |                                                                                                   | 2            | 0             | 20           | 10           | 10           | 0              | 38           | 3.62         | 0           | 0  | 0  |
|       | 1 Zli C | 2                                | 1981             | 1                                                | 2                                                                                                 | 3            | 3             | 40           | 40           | 40           | 5              | 4            | 2.99         | 22          | 17 | 5  |
|       | 1 Gxi D | 2                                | 1964             | 1                                                | 2                                                                                                 | 9            | 9             | 80           | 70           | 80           | 17             | 96           | 6.85         | 6           | 4  | 2  |
|       | 1 Yli D | 2                                | 1973             | 0                                                |                                                                                                   | 4            | 0             | 20           | 30           | 20           | 1              | 11           | 3.07         | 6           | 6  | 0  |
|       | 1 Lxi D | 2                                | 1952             | 0                                                |                                                                                                   | 4            | 0             | 10           | 10           | 20           | 2              | 13           | 3.05         | 21          | 15 | 6  |
|       | 3 We Fa | 1                                | 1967             | 1                                                | 1                                                                                                 | 1            | 1             | 5            | 5            | 10           | 0              | 7            | 2.27         | 77          | 54 | 23 |
|       | 2 Eyu F | 1                                | 1951             | 0                                                |                                                                                                   | 1            | 0             | 15           | 15           | 10           | 1              | 9            | 2.31         | 13          | 13 | 0  |
|       | 3 Pi Fe | 2                                | 1950             | 0                                                |                                                                                                   | 1            | 1             | 10           | 40           | 40           | 1              | 73           | 3.98         | 3           | 3  | 0  |
|       | 1 Lli G | 2                                | 1970             | 0                                                |                                                                                                   | 5            | 2             | 30           | 30           | 30           | 3              | 90           | 5.22         | 8           | 6  | 2  |
|       | 3 Xyu G | 2                                | 1955             | 0                                                |                                                                                                   | 0            | 0             | 0            | 5            | 7            | 0              | 8            | 1.46         | 23          | 17 | 6  |
|       | 1 Mxi G | 2                                | 1955             | 0                                                |                                                                                                   | 1            | 0             | 0            | 20           | 25           | 0              | 44           | 3.2          | 16          | 15 | 1  |
|       | 3 Jxi G | 2                                | 1960             | 0                                                |                                                                                                   | 3            | 0             | 20           | 20           | 20           | 0              | 8            | 2.7          | 2           | 2  | 0  |
|       | 2 Rfe G | 2                                | 1957             | 0                                                |                                                                                                   | 5            | 2             | 50           | 40           | 50           | 3              | 13           | 4.15         | 69          | 52 | 17 |
|       | 2 Wqi G | 2                                | 1968             | 1                                                | 2                                                                                                 | 1            | 1             | 20           | 20           | 10           | 0              | 9            | 2.66         | 1           | 1  | 0  |
|       | 3 Jyi H | 2                                | 1977             | 1                                                | 1                                                                                                 | 2            | 1             | 10           | 10           | 10           | 0              | 12           | 2.95         | 17          | 16 | 1  |
|       | 3 Qru H | 2                                | 1956             | 0                                                |                                                                                                   | 0            | 0             | 0            | 40           | 20           | 9              | 51           | 2.75         | 106         | 64 | 42 |
|       | 3 We Ha | 2                                | 1965             | 0                                                |                                                                                                   | 2            | 1             | 30           | 30           | 30           | 7              | 33           | 3.94         | 15          | 14 | 1  |
|       | 2 Jbo H | 2                                | 1982             | 0                                                |                                                                                                   | 0            | 0             | 0            | 0            | 0            | 0              | 3            | 0.77         | 34          | 23 | 11 |
|       | 3 Jxi J | 2                                | 1964             | 0                                                |                                                                                                   | 2            | 2             | 6            | 16           | 18           | 0              | 10           | 2.88         | 0           | 0  | 0  |
|       | 1 Lli J | 2                                | 1980             | 0                                                |                                                                                                   | 1            | 1             | 3            | 3            | 4            | 0              | 5            | 2.01         | 23          | 19 | 4  |

| Group | name    | gender<br>(1=male,<br>2=female ) | year of<br>birth | 24w-<br>52w_treat<br>(non=0,<br>treatment=1<br>) | 24w-<br>52w_me<br>d<br>(TCM=0,<br>WM=1,<br>IM=2,<br>non=3<br>) | TJC<br>(52w<br>) | SJC<br>(52w<br>) | VAS<br>(52w) | PhGA(5<br>2w) | PGA(52<br>w) | HAQ(52<br>w) | ESR<br>(52w<br>) | DAS28(<br>52w) | TSS(52<br>w) | JSN(52<br>w) | JE(52w<br>) |    |
|-------|---------|----------------------------------|------------------|--------------------------------------------------|----------------------------------------------------------------|------------------|------------------|--------------|---------------|--------------|--------------|------------------|----------------|--------------|--------------|-------------|----|
|       |         |                                  |                  |                                                  |                                                                |                  |                  |              |               |              |              |                  |                |              |              |             |    |
|       | 1 Lu Ji |                                  | 2                | 1979                                             | 0                                                              |                  | 1                | 1            | 10            | 10           | 10           | 0                | 27             | 3.29         | 43           | 13          | 30 |
|       | 1 Xqi K |                                  | 2                | 1954                                             | 0                                                              |                  | 0                | 0            | 0             | 30           | 10           | 0                | 58             | 2.84         | 0            | 0           | 0  |
|       | 2 Xqi K |                                  | 2                | 1971                                             | 0                                                              |                  | 2                | 3            | 50            | 40           | 70           | 9                | 18             | 4.01         | 44           | 30          | 14 |
|       | 1 Csh L |                                  | 2                | 1962                                             | 0                                                              |                  | 10               | 4            | 20            | 60           | 40           | 12               | 40             | 5.19         | 2            | 2           | 0  |
|       | 1 Jho L |                                  | 2                | 1959                                             | 0                                                              |                  | 1                | 0            | 20            | 10           | 20           | 0                | 16             | 2.78         | 9            | 7           | 2  |
|       | 3 Jyu L |                                  | 2                | 1996                                             | 0                                                              |                  | 3                | 3            | 60            | 10           | 20           | 2                | 26             | 4.59         | 171          | 83          | 88 |
|       | 1 Jpi L |                                  | 2                | 1951                                             | 1                                                              | 3                | 0                | 0            | 20            | 30           | 20           | 0                | 58             | 3.13         | 2            | 2           | 0  |
|       | 1 Sju L |                                  | 2                | 1981                                             | 0                                                              |                  | 6                | 7            | 0             | 50           | 50           | 3                | 61             | 4.99         | 5            | 5           | 0  |
|       | 3 Xbo L |                                  | 1                | 1979                                             | 0                                                              |                  | 4                | 0            | 30            | 30           | 30           | 0                | 19             | 3.6          | 3            | 2           | 1  |
|       | 2 Xhu L |                                  | 2                | 1972                                             | 0                                                              |                  | 2                | 0            | 10            | 10           | 10           | 2                | 13             | 2.72         | 13           | 13          | 0  |
|       | 3 Fya L |                                  | 2                | 1959                                             | 0                                                              |                  | 4                | 3            | 10            | 10           | 10           | 3                | 27             | 4.05         | 0            | 0           | 0  |
|       | 3 Ghu L |                                  | 2                | 1955                                             | 0                                                              |                  | 8                | 6            | 30            | 30           | 30           | 1                | 50             | 5.43         | 13           | 10          | 3  |
|       | 3 Hti L |                                  | 2                | 1953                                             | 1                                                              | 1                | 0                | 0            | 0             | 10           | 0            | 0                | 9              | 1.54         | 0            | 0           | 0  |
|       | 2 Jla L |                                  | 2                | 1969                                             | 0                                                              |                  | 0                | 0            | 10            | 50           | 70           | 0                | 14             | 1.99         | 5            | 5           | 0  |
|       | 1 Jhu L |                                  | 2                | 1977                                             | 0                                                              |                  | 0                | 0            | 0             | 0            | 0            | 0                | 22             | 2.16         | 0            | 0           | 0  |
|       | 3 Li Li |                                  | 2                | 1969                                             | 0                                                              |                  | 5                | 0            | 40            | 40           | 40           | 3                |                |              | 5            | 4           | 1  |
|       | 3 Mi Li |                                  | 2                | 1955                                             | 0                                                              |                  | 6                | 6            | 10            | 20           | 20           | 5                | 47             | 4.89         | 48           | 31          | 17 |
|       | 2 Syi L |                                  | 2                | 1958                                             | 0                                                              |                  | 0                | 0            | 0             | 3            | 5            | 0                | 7              | 1.36         | 2            | 2           | 0  |
|       | 2 Xme L |                                  | 2                | 1964                                             | 1                                                              | 2                | 23               | 15           | 80            | 80           | 60           | 1                | 74             | 7.91         | 77           | 54          | 23 |
|       | 2 Wji L |                                  | 2                | 1983                                             | 0                                                              |                  | 0                | 2            | 10            | 10           | 10           | 0                | 8              | 2            | 87           | 68          | 19 |
|       | 2 Bju M |                                  | 2                | 1977                                             | 0                                                              |                  | 4                | 0            | 30            | 40           | 30           | 2                | 31             | 3.94         | 13           | 13          | 0  |
|       | 1 Gpi M |                                  | 2                | 1965                                             | 1                                                              | 1                | 1                | 7            | 0             | 50           | 10           | 1                | 24             | 3.53         | 11           | 11          | 0  |
|       | 2 Wyi M |                                  | 2                | 1988                                             | 0                                                              |                  | 1                | 1            | 47            | 51           | 57           | 3                | 49             | 4.23         | 68           | 47          | 21 |
|       | 2 Ji Me |                                  | 2                | 1964                                             | 0                                                              |                  | 2                | 0            | 10            | 10           | 10           | 0                | 18             | 2.95         | 15           | 14          | 1  |
|       | 1 Yhu M |                                  | 2                | 1974                                             | 0                                                              |                  | 0                | 0            | 0             | 5            | 1            | 0                | 5              | 1.13         | 5            | 5           | 0  |
|       | 1 Xro N |                                  | 2                | 1978                                             | 0                                                              |                  | 21               | 7            | 80            | 80           | 80           | 20               | 117            | 7.76         | 9            | 7           | 2  |

| Group | name    | gender<br>(1=male,<br>2=female ) | year of<br>birth | 24w-<br>52w_treat           | 24w-<br>52w_meat                    | TJC<br>(52w ) | SJC<br>(52w ) | VAS<br>(52w) | PhGA(5<br>2w) | PGA(52<br>w) | HAQ(52<br>w) | ESR<br>(52w ) | DAS28(<br>52w) | TSS(52<br>w) | JSN(52<br>w) | JE(52w<br>) |
|-------|---------|----------------------------------|------------------|-----------------------------|-------------------------------------|---------------|---------------|--------------|---------------|--------------|--------------|---------------|----------------|--------------|--------------|-------------|
|       |         |                                  |                  | (non=0,<br>treatment=1<br>) | (TCM=0,<br>WM=1,IM=2,<br>non=3<br>) |               |               |              |               |              |              |               |                |              |              |             |
|       | 3 Yli P | 2                                | 1962             | 1                           | 2                                   | 7             | 3             | 25           | 30            | 10           | 3            | 58            | 5.16           | 3            | 2            | 1           |
|       | 3 Jju R | 2                                | 1972             | 0                           |                                     | 4             | 0             | 20           | 20            | 30           | 0            | 6             | 2.65           | 56           | 38           | 18          |
|       | 3 Yli S | 1                                | 1954             | 0                           |                                     | 2             | 1             | 60           | 60            | 60           | 8            | 52            | 4.69           | 10           | 10           | 0           |
|       | 3 Cxi S | 2                                | 1972             | 0                           |                                     | 3             | 0             | 30           | 30            | 30           | 1            | 19            | 3.45           | 0            | 0            | 0           |
|       | 1 Syu S | 2                                | 1953             | 0                           |                                     | 0             | 0             | 0            | 10            | 0            | 0            | 51            | 2.75           | 4            | 3            | 1           |
|       | 2 Xla S | 2                                | 1955             | 0                           |                                     | 18            | 7             | 40           | 40            | 40           | 12           | 20            | 5.77           | 4            | 1            | 3           |
|       | 3 Mpi T | 2                                | 1956             | 0                           |                                     | 0             | 0             | 0            | 0             | 0            | 0            | 29            | 2.36           | 54           | 18           | 36          |
|       | 3 Ji Ti | 2                                | 1958             | 1                           | 1                                   | 11            | 6             | 30           | 30            | 30           | 6            | 45            | 5.63           | 11           | 5            | 6           |
|       | 2 Xya T | 2                                | 1976             | 0                           |                                     | 3             | 3             | 30           | 30            | 30           | 9            | 13            | 3.67           | 77           | 54           | 23          |
|       | 2 Sde W | 1                                | 1968             | 1                           | 2                                   | 1             | 0             | 0            | 40            | 0            | 0            | 63            | 3.46           | 62           | 35           | 27          |
|       | 2 Hqi W | 2                                | 1963             | 0                           |                                     | 4             | 0             | 40           | 40            | 40           | 1            | 39            | 4.24           | 2            | 2            | 0           |
|       | 2 Jyu W | 1                                | 1953             | 0                           |                                     | 4             | 0             | 10           | 40            | 10           | 0            | 1             | 1.25           | 34           | 22           | 12          |
|       | 2 Li Wa | 2                                | 1982             | 0                           |                                     | 4             | 0             | 10           | 10            | 10           | 1            | 14            | 3.1            | 6            | 6            | 0           |
|       | 1 Lju W | 2                                | 1975             | 0                           |                                     | 7             | 4             | 20           | 25            | 20           | 2            | 34            | 4.79           | 16           | 16           | 0           |
|       | 1 Mi Wa | 2                                | 1982             | 0                           |                                     | 5             | 3             | 40           | 30            | 10           | 6            | 12            | 4.04           | 7            | 6            | 1           |
|       | 3 Pi Wa | 1                                | 1959             | 0                           |                                     | 0             | 0             | 0            | 0             | 0            | 0            | 22            | 2.16           | 0            | 0            | 0           |
|       | 3 Rha W | 1                                | 1963             | 1                           | 1                                   | 4             | 1             | 10           | 10            | 10           | 1            | 4             | 2.51           | 1            | 1            | 0           |
|       | 2 Sli W | 2                                | 1957             | 0                           |                                     | 3             | 0             | 30           | 30            | 30           | 0            | 36            | 3.9            | 2            | 2            | 0           |
|       | 2 Sfe W | 2                                | 1954             | 0                           |                                     | 5             | 7             | 10           | 10            | 10           | 4            | 11            | 3.81           | 4            | 1            | 3           |
|       | 1 Szh W | 2                                | 1962             | 0                           |                                     | 2             | 2             | 5            | 11            | 10           | 0            | 13            | 3.05           | 14           | 9            | 5           |
|       | 3 Xxi W | 2                                | 1958             | 1                           | 1                                   | 5             | 1             | 20           | 40            | 20           | 4            | 10            | 3.42           | 1            | 0            | 1           |
|       | 1 Xho W | 2                                | 1970             | 0                           |                                     | 1             | 1             | 10           | 10            | 5            | 0            | 9             | 2.52           | 0            | 0            | 0           |
|       | 1 Xyi W | 2                                | 1955             | 0                           |                                     | 0             | 0             | 10           | 10            | 10           | 0            | 15            | 2.04           | 5            | 4            | 1           |
|       | 2 Yju W | 1                                | 1973             | 0                           |                                     | 4             | 0             | 10           | 10            | 10           | 0            | 7             | 2.61           | 0            | 0            | 0           |
|       | 2 Cli W | 1                                | 1981             | 0                           |                                     | 6             | 8             | 0            | 80            | 75           | 23           | 75            | 5.18           | 7            | 7            | 0           |
|       | 3 Sju W | 2                                | 1959             | 0                           |                                     | 2             | 0             | 10           | 10            | 10           | 0            | 35            | 3.42           | 10           | 8            | 2           |

| Group | name    | gender<br>(1=male,<br>2=female ) | year of<br>birth | 24w-<br>52w_treat<br>(non=0,<br>treatment=1<br>) | 24w-<br>52w_med<br>(TCM=0,<br>WM=1,<br>IM=2,<br>non=3<br>) | TJC<br>(52w<br>) | SJC<br>(52w<br>) | VAS<br>(52w) | PhGA(5<br>2w) | PGA(52<br>w) | HAQ(52<br>w) | ESR<br>(52w<br>) | DAS28(52w) | TSS(52<br>w) | JSN(52<br>w) | JE(52w<br>) |    |
|-------|---------|----------------------------------|------------------|--------------------------------------------------|------------------------------------------------------------|------------------|------------------|--------------|---------------|--------------|--------------|------------------|------------|--------------|--------------|-------------|----|
|       | 2 We We |                                  | 2                | 1953                                             | 0                                                          |                  | 3                | 3            | 30            | 20           | 10           | 4                | 29         | 4.24         | 12           | 11          | 1  |
|       | 3 Gue W |                                  | 2                | 1959                                             | 0                                                          |                  | 1                | 0            | 10            | 10           | 10           | 0                | 23         | 2.89         | 6            | 6           | 0  |
|       | 2 Yme W |                                  | 2                | 1982                                             | 1                                                          | 2                | 2                | 0            | 50            | 50           | 10           | 0                | 6          | 2.75         | 0            | 0           | 0  |
|       | 2 Xme W |                                  | 2                | 1965                                             | 1                                                          | 1                | 0                | 1            | 10            | 20           | 10           | 0                | 21         | 2.56         | 3            | 0           | 3  |
|       | 1 Ypi X |                                  | 2                | 1969                                             | 0                                                          |                  | 4                | 0            | 20            | 20           | 20           | 0                | 11         | 3.07         | 0            | 0           | 0  |
|       | 1 Hya X |                                  | 2                | 1977                                             | 0                                                          |                  | 2                | 6            | 30            | 40           | 30           | 7                | 25         | 4.16         | 9            | 9           | 0  |
|       | 3 Swe X |                                  | 2                | 1983                                             | 0                                                          |                  | 2                | 0            | 10            | 10           | 10           | 0                | 8          | 2.38         | 2            | 2           | 0  |
|       | 2 Hni Y |                                  | 1                | 1972                                             | 0                                                          |                  | 2                | 0            | 40            | 20           | 40           | 2                | 14         | 3.2          | 10           | 8           | 2  |
|       | 1 Ju Ya |                                  | 2                | 1949                                             | 0                                                          |                  | 0                | 0            | 0             | 50           | 30           | 1                | 5          | 1.13         | 8            | 8           | 0  |
|       | 2 Li Ya |                                  | 2                | 1985                                             | 0                                                          |                  | 3                | 0            | 10            | 10           | 10           | 0                | 25         | 3.36         | 5            | 5           | 0  |
|       | 3 Lxi Y |                                  | 2                | 1970                                             | 0                                                          |                  | 0                | 0            | 2             | 5            | 3            | 6                | 6          | 1.28         | 12           | 10          | 2  |
|       | 3 Xyu Y |                                  | 2                | 1973                                             | 0                                                          |                  | 1                | 1            | 50            | 0            | 50           | 0                | 5          | 2.68         | 0            | 0           | 0  |
|       | 2 Xne Y |                                  | 2                | 1966                                             | 0                                                          |                  | 3                | 0            | 20            | 20           | 20           | 0                | 3          | 2.01         | 6            | 5           | 1  |
|       | 3 Hxi Z |                                  | 2                | 1956                                             | 0                                                          |                  | 2                | 1            | 0             | 50           | 50           | 9                | 29         | 3.43         | 17           | 10          | 7  |
|       | 3 Chu Z |                                  | 2                | 1968                                             | 1                                                          | 1                | 3                | 1            | 40            | 30           | 40           | 6                | 10         | 3.43         | 5            | 5           | 0  |
|       | 1 Fyi Z |                                  | 2                | 1966                                             | 0                                                          |                  | 5                | 5            | 20            | 20           | 30           | 3                | 55         | 4.97         | 8            | 8           | 0  |
|       | 3 Jhu Z |                                  | 2                | 1970                                             | 0                                                          |                  | 0                | 0            | 26            | 32           | 32           | 0                | 9          | 1.91         | 16           | 12          | 4  |
|       | 3 Jqi Z |                                  | 2                | 1960                                             | 0                                                          |                  | 10               | 0            | 12            | 10           | 10           | 2                | 23         | 4.12         | 5            | 4           | 1  |
|       | 1 Qni Z |                                  | 2                | 1979                                             | 0                                                          |                  | 5                | 0            | 20            | 20           | 20           | 0                | 36         | 4.03         | 0            | 0           | 0  |
|       | 1 Xya Z |                                  | 2                | 1982                                             | 0                                                          |                  | 0                | 0            | 10            | 20           | 20           | 1                | 16         | 2.08         | 51           | 23          | 28 |
|       | 2 Xzh Z |                                  | 2                | 1958                                             | 1                                                          | 1                | 9                | 0            | 20            | 20           | 20           | 10               | 14         | 3.8          | 58           | 40          | 18 |
|       | 2 Zch Z |                                  | 1                | 1963                                             | 0                                                          |                  | 9                | 0            | 20            | 20           | 20           | 0 NA             |            |              | 13           | 8           | 5  |
|       | 2 Mju Z |                                  | 2                | 1984                                             | 0                                                          |                  | 3                | 0            | 30            | 20           | 30           | 2                | 12         | 3.13         | 0            | 0           | 0  |
|       | 3 Zyi Z |                                  | 2                | 1987                                             | 0                                                          |                  | 3                | 0            | 10            | 10           | 10           | 3                | 24         | 3.33         | 23           | 20          | 3  |
|       | 3 Cne Z |                                  | 2                | 1960                                             | 0                                                          |                  | 7                | 0            | 40            | 40           | 40           | 10               | 42         | 4.65         | 0            | 0           | 0  |
|       | 1 Mfa Z |                                  | 2                | 1952                                             | 0                                                          |                  | 15               | 2            | 60            | 50           | 50           | 9                | 73         | 6.41         | 0            | 0           | 0  |

| Group | name    | gender<br>(1=male,<br>2=female ) | year of<br>birth | 24w-<br>52w_treat<br>(non=0,<br>treatment=1<br>) | 24w-<br>52w_meat<br>(TCM=0,<br>WM=1,<br>IM=2,<br>non=3<br>) | TJC<br>(52w ) | SJC<br>(52w ) | VAS<br>(52w) | PhGA(5<br>2w) | PGA(52<br>w) | HAQ(52<br>w) | ESR<br>(52w ) | DAS28(<br>52w) | TSS(52<br>w) | JSN(52<br>w) | JE(52w<br>) |   |
|-------|---------|----------------------------------|------------------|--------------------------------------------------|-------------------------------------------------------------|---------------|---------------|--------------|---------------|--------------|--------------|---------------|----------------|--------------|--------------|-------------|---|
|       |         |                                  |                  |                                                  |                                                             |               |               |              |               |              |              |               |                |              |              |             |   |
|       | 3 Mi Zh |                                  | 2                | 1969                                             | 0                                                           |               | 5             | 1            | 30            | 30           | 30           | 1             | 20             | 4.05         | 34           | 26          | 8 |
|       | 1 Jme Z |                                  | 2                | 1965                                             | 1                                                           | 1             | 1             | 1            | 30            | 30           | 30           | 0             | 9              | 2.8          | 18           | 14          | 4 |
|       | 2 Rqi H |                                  | 2                | 1971                                             | quit                                                        |               |               |              |               |              |              |               |                |              |              |             |   |
|       | 3 Xyu W |                                  | 2                | 1967                                             | 0                                                           |               | 1             | 1            | 20            | 25           | 25           | 2             | 23             | 3.32         |              |             |   |
|       | 3 Ju Wa |                                  | 2                | 1978                                             | 0                                                           |               | 1             | 1            | 10            | 10           | 10           | 0             | 8              | 2.44         |              |             |   |
|       | 1 Sju Z |                                  | 2                | 1957                                             | 0                                                           |               | 1             | 1            | 25            | 30           | 30           | 1             | 84             | 4.3          |              |             |   |
|       | 2 Lli H |                                  | 2                | 1981                                             | 0                                                           |               | 4             | 4            | 20            | 20           | 20           | 0             | 48             | 4.67         |              |             |   |
|       | 1 Yi Wa |                                  | 2                | 1967                                             | 1                                                           | 0             | 1             | 0            | 10            | 10           | 10           | 1             | 16             | 2.64         |              |             |   |
|       | 3 Ypi M |                                  | 2                | 1963                                             | 0                                                           |               | 0             | 1            | 30            | 30           | 35           | 1             | 17             | 2.69         |              |             |   |
|       | 3 Hyu X |                                  | 2                | 1957                                             | quit                                                        |               |               |              |               |              |              |               |                |              |              |             |   |
|       | 3 Yme Z |                                  | 2                | 1979                                             | 1                                                           | 2             | 0             | 0            | 5             | 5            | 5            | 0             | 11             | 1.75         |              |             |   |
|       | 2 Fro G |                                  | 2                | 1952                                             | 0                                                           |               | 7             | 3            | 40            | 40           | 40           | 5             | 13             | 4.32         |              |             |   |
|       | 1 Sxi R |                                  | 2                | 1966                                             | quit                                                        |               |               |              |               |              |              |               |                |              |              |             |   |
|       | 3 Xi Ya |                                  | 2                | 1968                                             | 0                                                           |               | 0             | 0            | 0             | 30           | 30           | 0             | 30             | 2.38         |              |             |   |
|       | 2 Xla Q |                                  | 2                | 1963                                             | quit                                                        |               |               |              |               |              |              |               |                |              |              |             |   |
|       | 1 Jli C |                                  | 2                | 1964                                             | 0                                                           |               | 2             | 4            | 30            | 35           | 30           | 9 NA          |                |              |              |             |   |
|       | 2 Jji Z |                                  | 2                | 1971                                             | 0                                                           |               | 4             | 3            | 30            | 30           | 30           | 1             | 14             | 3.88         |              |             |   |
|       | 2 Xwa L |                                  | 2                | 1974                                             | 0                                                           |               | 0             | 0            | 0             | 0            | 0            | 0             | 18             | 2.02         |              |             |   |
|       | 3 Lju M |                                  | 2                | 1954                                             | quit                                                        |               |               |              |               |              |              |               |                |              |              |             |   |
|       | 2 Zyu L |                                  | 1                | 1973                                             | 1                                                           | 2             | 2             | 0            | 30            | 30           | 30           | 6             | 14             | 3.06         |              |             |   |
|       | 1 Ju Wa |                                  | 2                | 1967                                             | quit                                                        |               |               |              |               |              |              |               |                |              |              |             |   |
|       | 1 Cfa Z |                                  | 1                | 1949                                             | 0                                                           |               | 0             | 0            | 10            | 15           | 10           | 0 NA          |                |              |              |             |   |
|       | 3 Wxi Y |                                  | 1                | 1964                                             | 0                                                           |               | 3             | 0            | 50            | 50           | 50           | 11            | 17             | 3.65         |              |             |   |
|       | 1 Ywe L |                                  | 2                | 1983                                             | 1                                                           | 1             | 2             | 4            | 30            | 30           | 30           | 1             | 20             | 3.88         |              |             |   |
|       | 3 Szh Y |                                  | 2                | 1951                                             | 0                                                           |               | 5             | 3            | 25            | 35           | 35           | 8             | 19             | 4.15         |              |             |   |
|       | 1 Lpi L |                                  | 1                | 1953                                             | 1                                                           | 2             | 0             | 0            | 0             | 5            | 10           | 0             | 49             | 2.72         |              |             |   |

| Group | name    | gender<br>(1=male,<br>2=female ) | year of<br>birth | 24w-<br>52w_treat<br>(non=0,<br>treatment=1<br>) | 24w-<br>52w_meat<br>(TCM=0,<br>WM=1,<br>IM=2,<br>non=3<br>) | TJC<br>(52w ) | SJC<br>(52w ) | VAS<br>(52w) | PhGA(5<br>2w) | PGA(52<br>w) | HAQ(52<br>w) | ESR<br>(52w ) | DAS28(52w) | TSS(52w) | JSN(52w) | JE(52w) |
|-------|---------|----------------------------------|------------------|--------------------------------------------------|-------------------------------------------------------------|---------------|---------------|--------------|---------------|--------------|--------------|---------------|------------|----------|----------|---------|
|       | 2 Zlo Y |                                  | 1                | 1964                                             | quit                                                        |               |               |              |               |              |              |               |            |          |          |         |
|       | 2 Xta P |                                  | 2                | 1985                                             | 0                                                           |               | 2             | 2            | 20            | 20           | 10           | 0 NA          |            |          |          |         |
|       | 1 Dzh Y |                                  | 2                | 1975                                             | 0                                                           |               | 1             | 0            | 35            | 35           | 40           | 0             | 15         | 2.95     |          |         |
|       | 1 Lru Z |                                  | 2                | 1962                                             | quit                                                        |               |               |              |               |              |              |               |            |          |          |         |
|       | 3 Wdo L |                                  | 1                | 1971                                             | 0                                                           |               | 3             | 3            | 10            | 10           | 10           | 0             | 5          | 2.72     |          |         |
|       | 2 Li Ma |                                  | 2                | 1964                                             | 0                                                           |               | 0             | 0            | 5             | 5            | 5            | 0             | 6          | 1.33     |          |         |
|       | 1 Gya L |                                  | 1                | 1990                                             | 0                                                           |               | 5             | 2            | 10            | 10           | 10           | 1             | 7          | 3.15     |          |         |
|       | 3 Hzh Z |                                  | 1                | 1983                                             | 1                                                           | 2             | 4             | 4            | 10            | 30           | 5            | 0             | 23         | 4.01     |          |         |
|       | 1 Dfa Y |                                  | 2                | 1950                                             | 1                                                           | 2             | 2             | 0            | 10            | 15           | 15           | 3             | 30         | 3.31     |          |         |
|       | 1 Yzh B |                                  | 2                | 1962                                             | quit                                                        |               |               |              |               |              |              |               |            |          |          |         |
|       | 3 Zpi S |                                  | 2                | 1963                                             | 0                                                           |               | 0             | 0            | 0             | 5            | 5            | 0             | 16         | 1.94     |          |         |
|       | 1 Cta D |                                  | 2                | 1986                                             | 0                                                           |               | 4             | 2            | 30            | 30           | 30           | 4             | 23         | 4.13     |          |         |
|       | 2 Yqi Z |                                  | 2                | 1956                                             | quit                                                        |               |               |              |               |              |              |               |            |          |          |         |
|       | 1 Mxi X |                                  | 2                | 1979                                             | 0                                                           |               | 0             | 0            | 10            | 10           | 10           | 0             | 23         | 2.34     |          |         |
|       | 3 Cla A |                                  | 2                | 1961                                             | 0                                                           |               | 4             | 3            | 40            | 30           | 30           | 5 NA          |            |          |          |         |
|       | 2 Ju Wa |                                  | 2                | 1966                                             | quit                                                        |               |               |              |               |              |              |               |            |          |          |         |
|       | 3 Dda D |                                  | 2                | 1984                                             | 1                                                           | 2             | 0             | 1            | 0             | 5            | 0            | 0             | 11         | 1.96     |          |         |
|       | 3 Fme L |                                  | 2                | 1971                                             | 0                                                           |               | 0             | 0            | 20            | 30           | 25           | 4             | 31         | 2.69     |          |         |
|       | 1 Jhu C |                                  | 2                | 1965                                             | 0                                                           |               | 2             | 2            | 10            | 30           | 30           | 4 NA          |            |          |          |         |
|       | 3 Ji Zh |                                  | 2                | 1970                                             | quit                                                        |               |               |              |               |              |              |               |            |          |          |         |
|       | 2 Qso L |                                  | 1                | 1975                                             | 1                                                           | 1             | 7             | 3            | 40            | 40           | 40           | 1             | 53         | 5.31     |          |         |
|       | 3 Fqi W |                                  | 2                | 1976                                             | 0                                                           |               | 0             | 0            | 20            | 30           | 20           | 4 NA          |            |          |          |         |
|       | 3 Lfe W |                                  | 2                | 1956                                             | 0                                                           |               | 1             | 1            | 0             | 10           | 0            | 5             | 21         | 2.97     |          |         |
|       | 2 Xme L |                                  | 2                | 1975                                             | 0                                                           |               | 2             | 2            | 0             | 10           | 10           | 0             | 16         | 3.13     |          |         |

Note: DAS28 28-joint count Disease Activity Score, CRP C-reactive protein, ESR erythrocyte sedimentation rate, TJC tender joint count, SJC swollen joint count, VAS visual analogue scale, PhGA Physician' s global assessment of disease activity, PGA Patient' s global assessment of disease activity, HAQ Health Assessment Questionnaire, TSS total Sharp score, JSN joint gap narrow score, JE joint erosion score.
